# Supplementary material
Source: PubMed Central journal article supplement (PMC5935589)
Supplement: NIHMS957134-supplement-4.pdf [file NIHMS957134-supplement-4.pdf]

## Supplementary Figure Legends

### Figure S1. Related to Figures 1-4. **Severe injury to the tracheal SAE leads to expansion of $\alpha$ SMA<sup>+</sup> cell populations.**

Mice were injected with vehicle, 200 mg/kg naphthalene, or 300 mg/kg naphthalene and tracheas were harvested on day 1, 3, 5, and 7 following vehicle or naphthalene injection. **(A-C)** Immunofluorescent staining for  $\alpha$ SMA expression at 3 days following **(A)** vehicle, **(B)** 200 mg/kg naphthalene, and **(C)** 300 mg/kg naphthalene injection. Arrowheads **(C)** mark a gland duct (white) and  $\alpha$ SMA<sup>+</sup> cells in the SAE (red). Tracheal cartilage rings are marked as cricoid cartilage (C0) and cartilage ring 1 (C1). **(D)** The percentage of total SAE cells that are  $\alpha$ SMA<sup>+</sup> at C0-C2 under the various injury conditions. **(E)** Fold change, relative to uninjured animals, in the percentage of  $\alpha$ SMA<sup>+</sup> cells in the SMGs. Data are shown as mean  $\pm$  SEM of N=3-6 mice from multiple sections  $>60 \mu\text{m}$  apart. Diamonds denote significance levels for Two-way ANOVA test:  $\diamond P<0.05$  and  $\diamond\diamond\diamond P<0.0001$ . Asterisks denote significance levels for Holm-Sidak's multiple comparisons test: \*  $P<0.05$ , \*\*  $P<0.01$ , \*\*\*  $P<0.001$ , and \*\*\*\*  $P<0.0001$ . **(F-H)** Lineage-tracing using **(F)** ACTA2-CreERT2:ROSA-TG and **(G,H)** MYH11-CreERT2:ROSA-TG. Mice were given 5 daily IP injections of tamoxifen, rested for 5 days, and then sacrificed for tracheal harvest and analysis by immunofluorescence. Tracheal sections were stained for nuclei, Tomato, GFP, and the indicated phenotypic markers: **(F and G)**  $\alpha$ SMA and **(H)** SMMHC. **(I, J)** Multi-wavelength cell scoring was used to quantify the lineage-tracing efficiency for the two lines as the percentage of  $\alpha$ SMA or SMMHC positive cells that also express the lineage marker GFP. Values represent the mean  $\pm$  SEM of N=7-10 mice per group.

### Figure S2. Related to Figure 1. **MEC-derived cells emerge from SMGs and adopt a basal cell-like phenotype on the SAE of injured MYH11-Cre<sup>ERT2</sup>:ROSA-TG mice.**

MYH11-Cre<sup>ERT2</sup>:ROSA-TG mice were given 5 daily IP injections of tamoxifen, rested for 5 days, and then injured with naphthalene (300 mg/kg). **(A-E)** Tracheal sections at 21 days post-injury are oriented with the proximal region to the left and were stained for nuclei, Tomato, GFP, and the indicated phenotypic markers: **(A)**  $\alpha$ SMA (**ai** and **aii**: enlarged images of the boxed regions shown in **A**); **(B)** Krt5 (**bi**: enlarged image of the boxed region shown in **B**); **(C)** Krt14; **(D)** DBA (**di** and **dii**: enlarged images of the boxed regions shown in **D**); and **(E)**  $\alpha$ Tubulin (arrows denote lineage-traced ciliated cells). **(F)** Quantification of the percentage of total SAE cells that are GFP+ (dotted line denotes background level of signal close to the basal lamina in uninjured controls). Values represent the mean  $\pm$  SEM of N=3 uninjured mice and N=6 injured mice. P-values indicate significance of **(F)** unpaired one-tailed Student's t-test, \*\* $P<0.01$ .

### Figure S3. Related to Figures 1-3. **MEC-derived progenitors contribute to basal and luminal cells in the SAE following SO<sub>2</sub> injury.**

**(A)** Timeline of lineage-tracing of myoepithelial cells in ACTA2-Cre<sup>ERT2</sup>:ROSA-TG mice induced with tamoxifen (Tmx) and injured with SO<sub>2</sub> (600 ppm). **(B-J)** Images of the GFP lineage trace with co-stained antigens as indicated for the **(B-G)** SAE and **(I-J)** SMGs. **(K,L)** Quantification of the percentage of total SAE cells that are GFP-positive in the **(K)** SAE and **(L)** SMGs. P-values indicate significance of one-way ANOVA followed by posttest for linear trend. **(M)** Quantification of the percentage of total GFP-positive cells that express each of the indicated markers. Values represent the mean  $\pm$  SEM of N=4-7 mice per group. Krt8<sup>+</sup> lineage-traced cells significantly increased over time (one-way ANOVA  $P=0.0064$  with a posttest for linear trend  $P=0.0016$ ). Micron bars: **(B-G)** 50  $\mu\text{m}$ ; **(H-J)** 25  $\mu\text{m}$ .

### Figure S4. Related to Figures 5 and 6. **Lef-1 expression in MECs using the MYH11-Cre<sup>ERT2</sup> driver enhances lineage contribution to SAE and SMGs following airway injury.**

*MYH11-Cre<sup>ERT2</sup>:Lef-KI<sup>+/-</sup>* mice were induced tamoxifen daily for 5 days, rested for 5 days, and then injured with naphthalene (300 mg/kg). Uninduced and induced/uninjured animals were used as controls. Animals were harvested at 21 days post-mock or naphthalene injury. **(A-H)** Tracheal images localizing the lineage trace (GFP) and  $\alpha$ SMA for **(A-D)** uninjured and **(E-H)** injured animals. **(I)** Quantification of the percentage of total cells that are GFP-negative in the SAE and SMGs. Values represent the mean  $\pm$  SEM for the (N) mice. P-values indicate significance of Kruskal-Wallis and Dunn's post-test, \* $P < 0.05$ . Micron bars: 50  $\mu$ m.

**Figure S5. Related to Figure 7. Basal cell transcriptional profile.**

**(A)** Surface airway epithelial cells were harvested and isolated by FACS into basal, club, and ciliated cell populations. Microarray analysis was performed on RNA collected from each cell population. **(B)** Principal component analysis of each sample indicates good separation of each cell type. **(C)** Unsupervised hierarchical clustering of genes showing distinct expression profiles for each cell type with at least 4 major groups of genes indicated by K-means++ gene clustering. **(D)** Examples of several canonical phenotypic markers indicated as being enriched ( $z$ -score  $> 1.75$ ) in each cell type.

**Figure S6. Related to Figure 7. MEC-derived progenitor cells are highly proliferative in primary cultures and Lef-1 expression enhances this phenotype.**

**(A-F)** *ACTA2-Cre<sup>ERT2</sup>:ROSA-TG* mice were induced by five daily injections with tamoxifen and cells were isolated from the **(A-C)** SAE and **(D-F)** SMGs five days after the last tamoxifen injection. **(B,C)** SAE and **(E,F)** SMG cells were expanded from passage 0-10 (P0-P10) and the proportion of SAE cells expressing Tomato or GFP at each passage was quantified by FACS. **(G-L)** Mixing experiments of P3 **(G-I)** untraced (red/Tomato<sup>+</sup>) or **(J-L)** lineage-traced (green/GFP<sup>+</sup>) glandular progenitors isolated from induced *ACTA2-Cre<sup>ERT2</sup>:ROSA-TG* mice and mixed with non-transgenic SAE progenitors at a ratio of 10% SMG:90% SAE. Mixed cultures were expanded from P3-P10 and the proportion of each phenotype was quantified by FACS at each passage. **(M-O)** *ACTA2-Cre<sup>ERT2</sup>:Lef-1KI<sup>+/+</sup>* and *ACTA2-Cre<sup>ERT2</sup>:ROSA-TG* mice were induced by five daily injections with tamoxifen and SMG cells were isolated five days later. FACS purified populations of MEC<sup>WT</sup> (GFP<sup>+</sup>) and MEC<sup>Lef-1KI</sup> (GFP<sup>-</sup>) at P3 were mixed at a ratio of 15% MEC<sup>Lef-1KI</sup>:85% MEC<sup>WT</sup> and cultured to the 8<sup>th</sup> passage. The proportion of each phenotype was quantified by FACS at each passage. Data represents the mean  $\pm$  SEM for N=6 cultures.

**Figure S7. Related to Figure 7. Differentiation of WT and Lef-1KI<sup>+/+</sup> MECs in air-liquid interface cultures and tracheal xenografts.**

**(A)** Schematic of experimental procedure for isolation of GFP<sup>+</sup> MEC<sup>WT</sup> and GFP<sup>-</sup> MEC<sup>Lef-1KI</sup> from glands of tamoxifen-induced *ACTA2-Cre<sup>ERT2</sup>:ROSA-TG* and *ACTA2-Cre<sup>ERT2</sup>:Lef-KI<sup>+/+</sup>* mice. Mice were induced by 5 sequential tamoxifen injections and rested for 5 days prior to harvest. **(B-I)** Phenotypes of cells in air-liquid interface (ALI) cultures established from a 50:50 mixture of MEC<sup>WT</sup> and MEC<sup>Lef-1KI</sup> cells showing **(B-E)** orthogonal views and **(F-I)** maximum intensity projections of the ALI culture. Cultures were immunostained for the indicated markers of **(B,F)** club (Scgb1a1), **(C,G)** ciliated ( $\alpha$ tubulin), and **(D,H)** Muc5AC and **(E,I)** Muc5B mucin secreting cells. **(J-L)** Denuded tracheal xenografts reconstituted with 90% non-transgenic SAE and 10% P2 *ACTA2-Cre<sup>ERT2</sup>:ROSA-TG* labeled SMG cells (~4% GFP<sup>+</sup> and ~6% Tomato<sup>+</sup>). Phenotypic markers assessed by immunofluorescence were: **(J)** Krt14, **(K)**  $\alpha$ tubulin, and **(L)** UEA-1. For panels J, boxed regions are enlarged and displayed to the right. **(M-Q)** Denuded tracheal xenografts reconstituted with FACS purified SMG cells isolated from tamoxifen-induced *ACTA2-Cre<sup>ERT2</sup>:ROSA-TG* (GFP<sup>+</sup>) and *ACTA2-Cre<sup>ERT2</sup>:Lef-KI<sup>+/+</sup>* (GFP<sup>-</sup>) mice and seeded at a ratio of 50:50. Sections are stained for the GFP and/or  $\alpha$ tubulin.

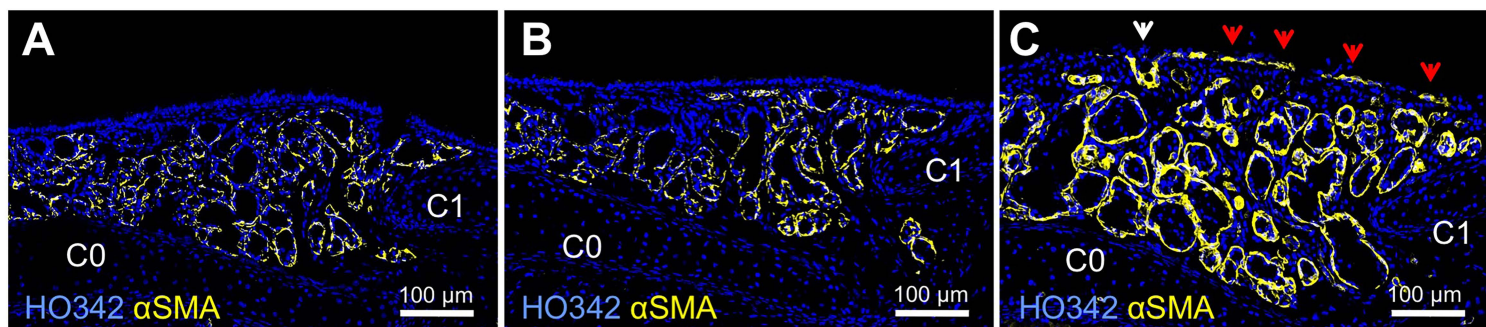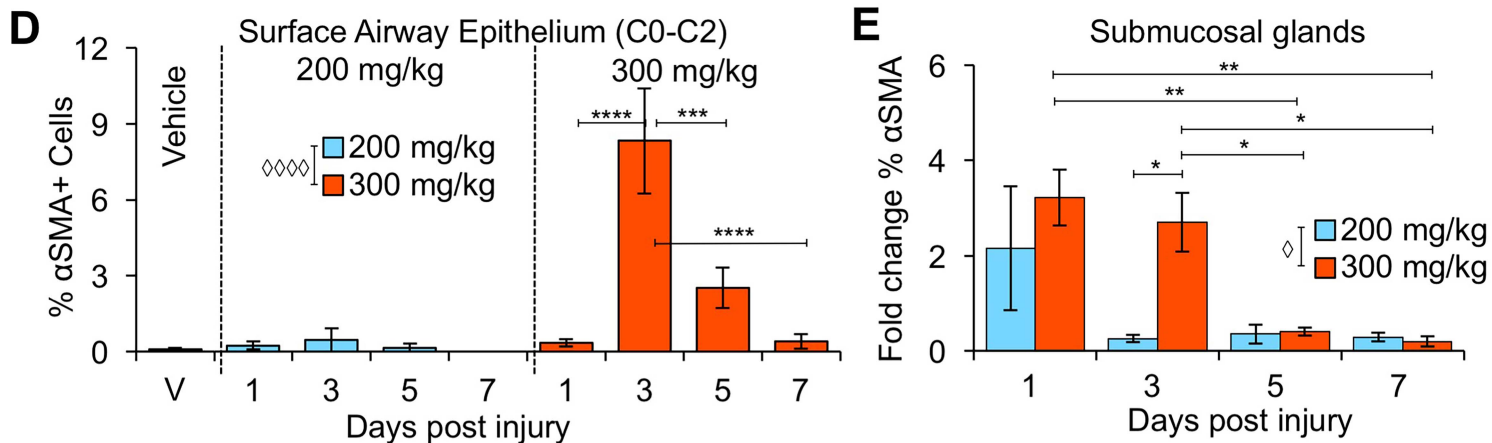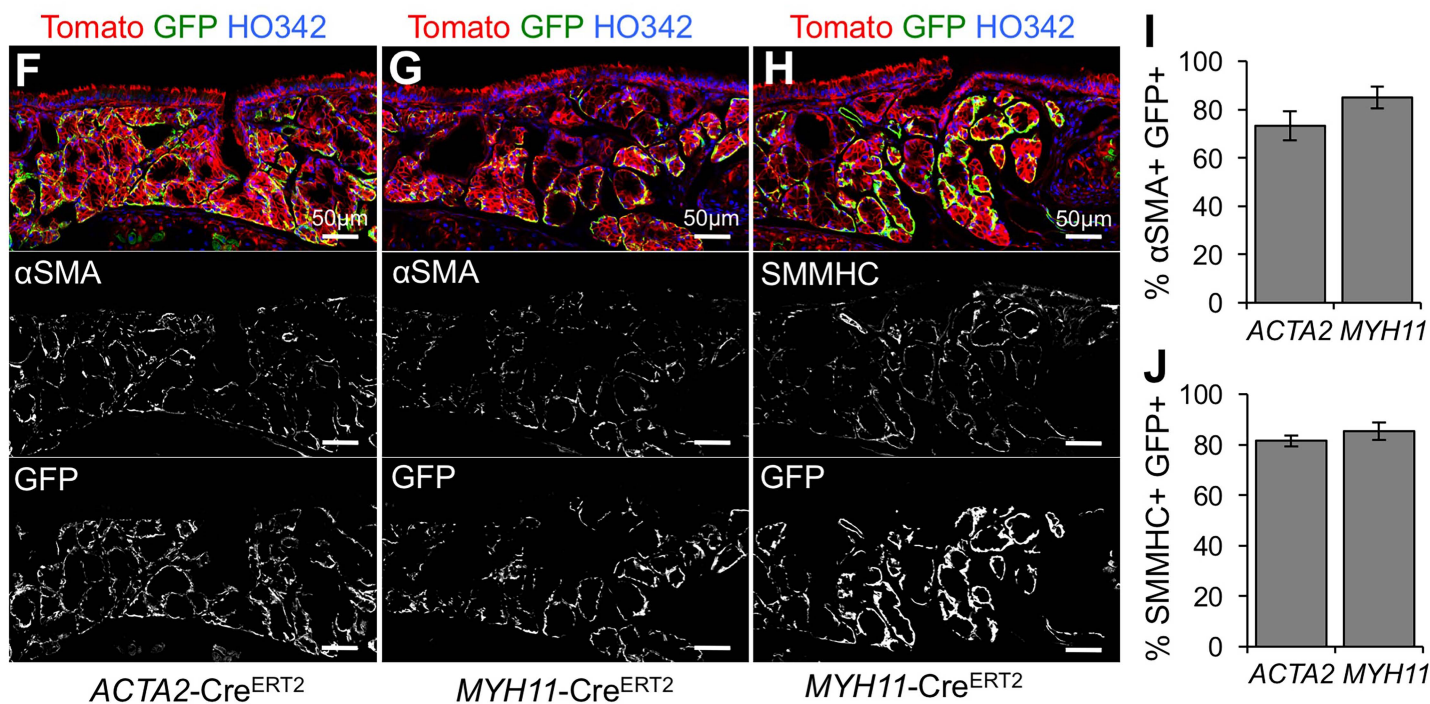

**Figure S2**

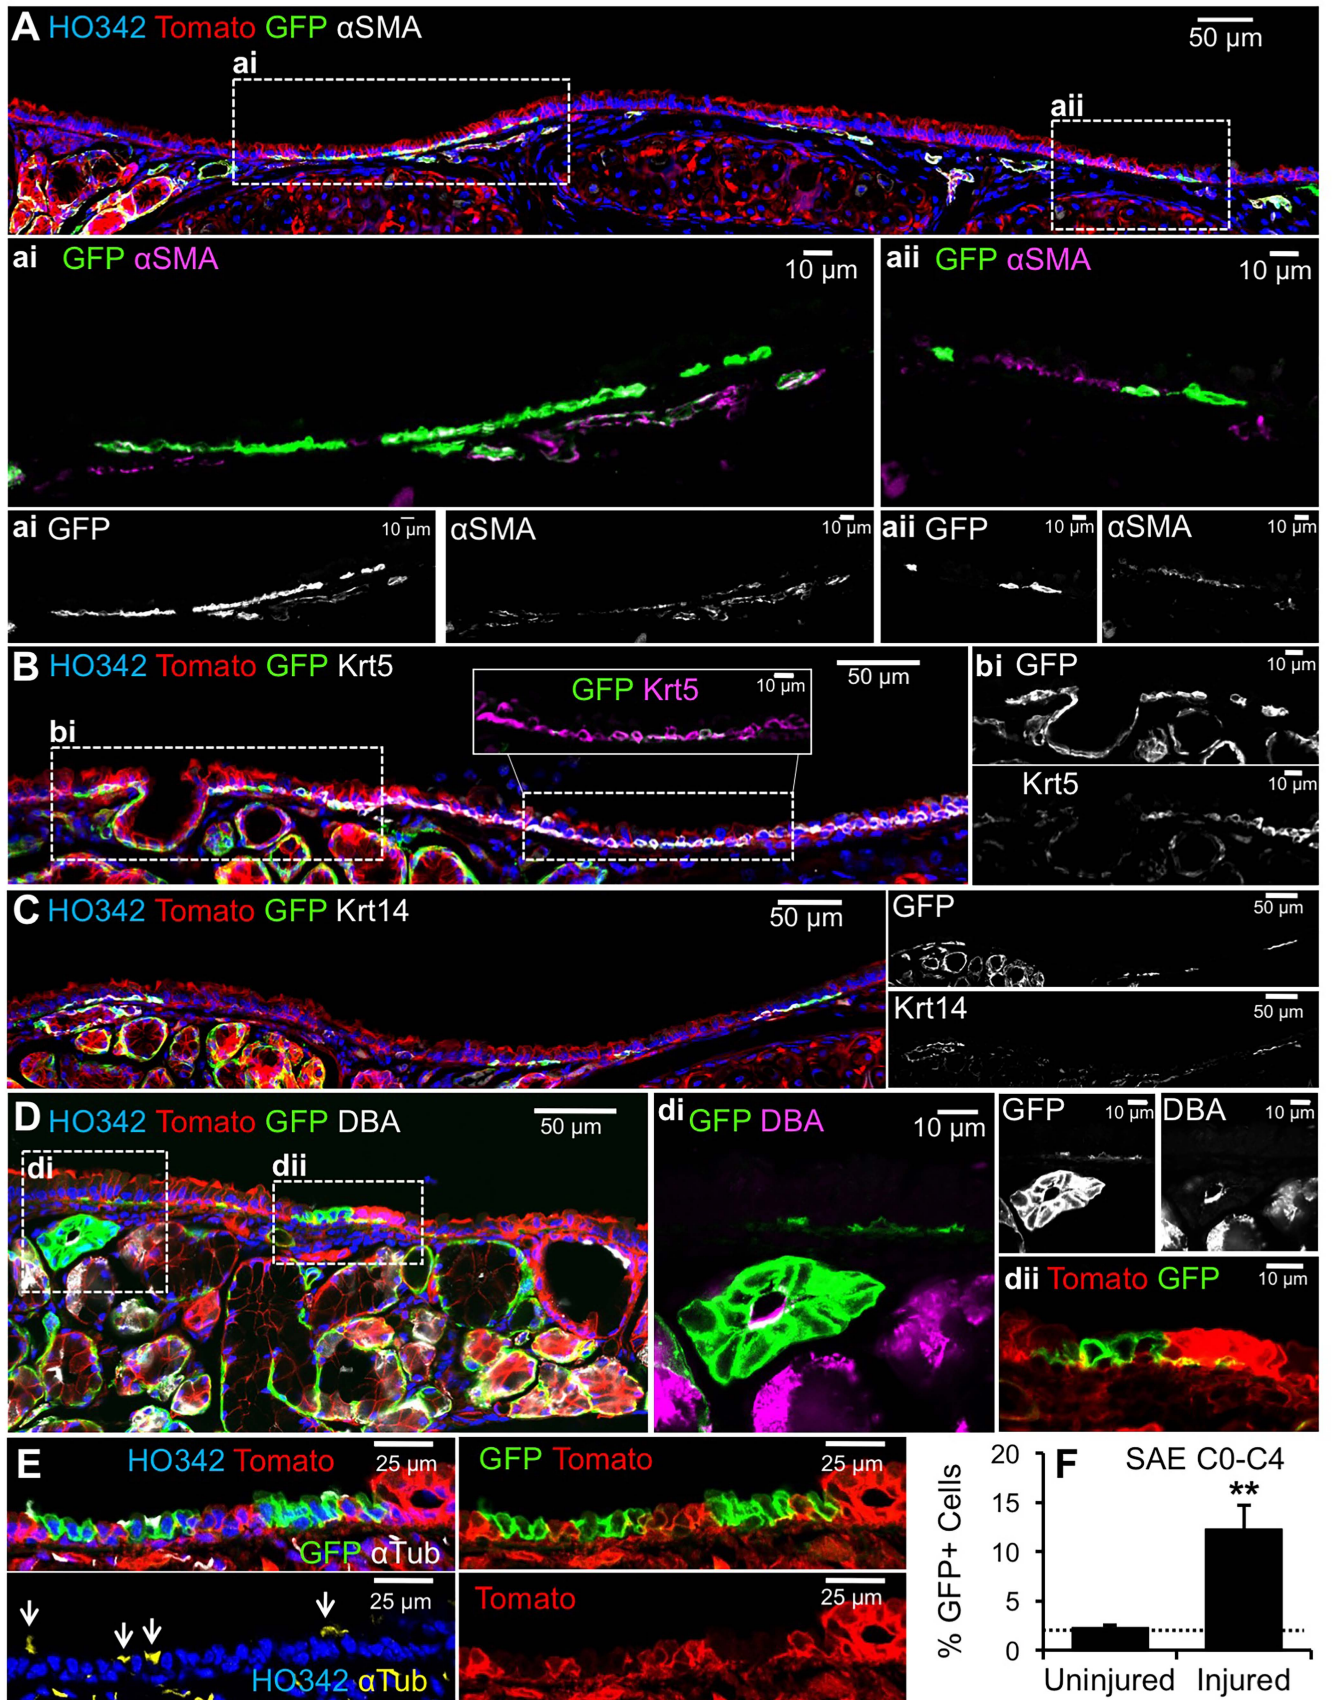

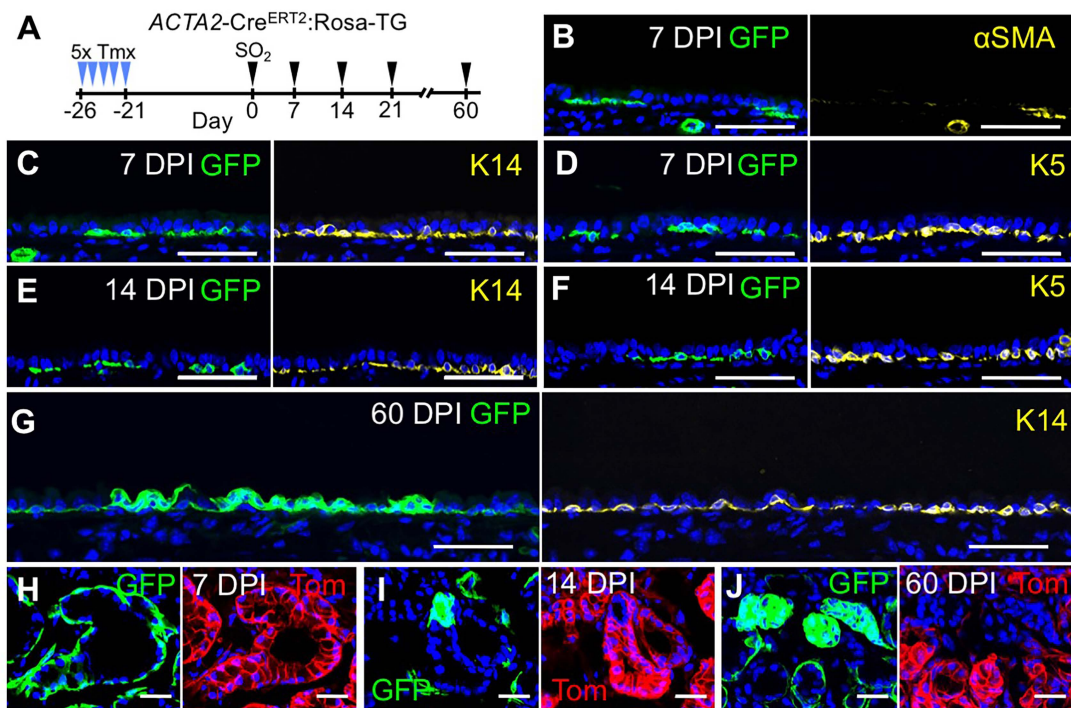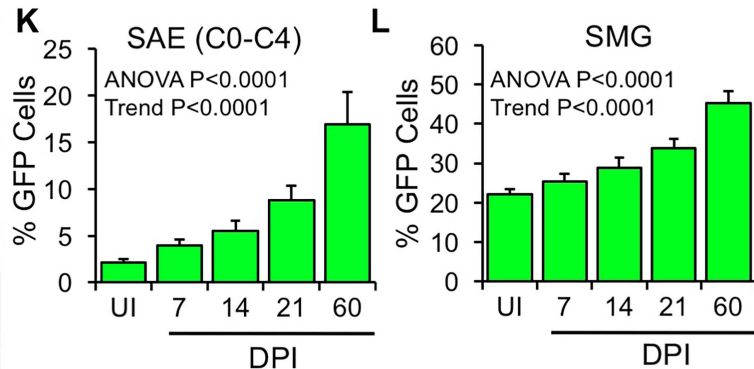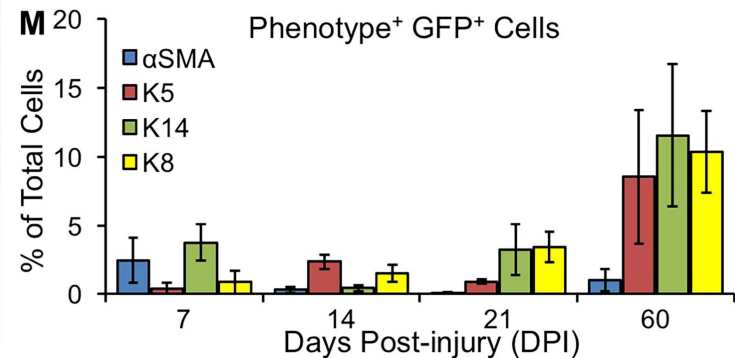

**Figure S4**

*MYH11-Cre<sup>ERT2</sup>: Lef-1KI<sup>+/-</sup>*

21 Days Uninjured

21 Days Injured

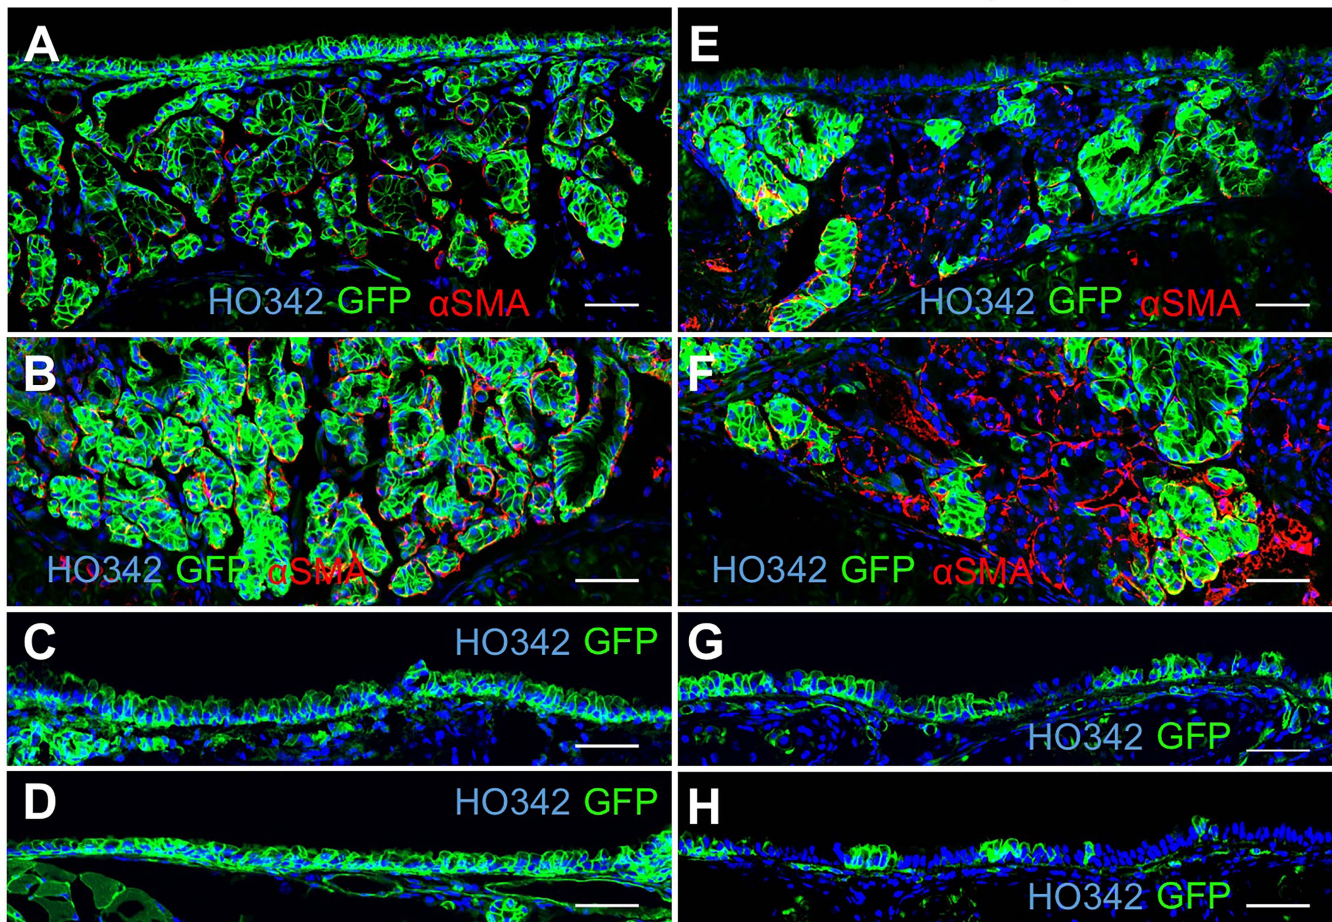

□ Uninduced (-Tmx)  
 ■ Uninjured (+Tmx)  
 ■ Injured (+Tmx)

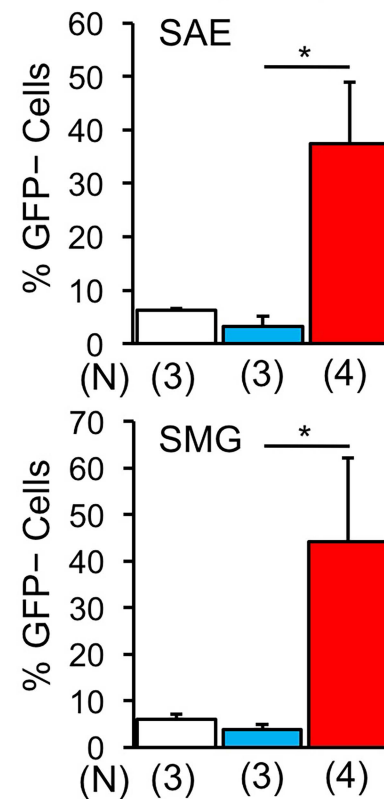

Figure S5

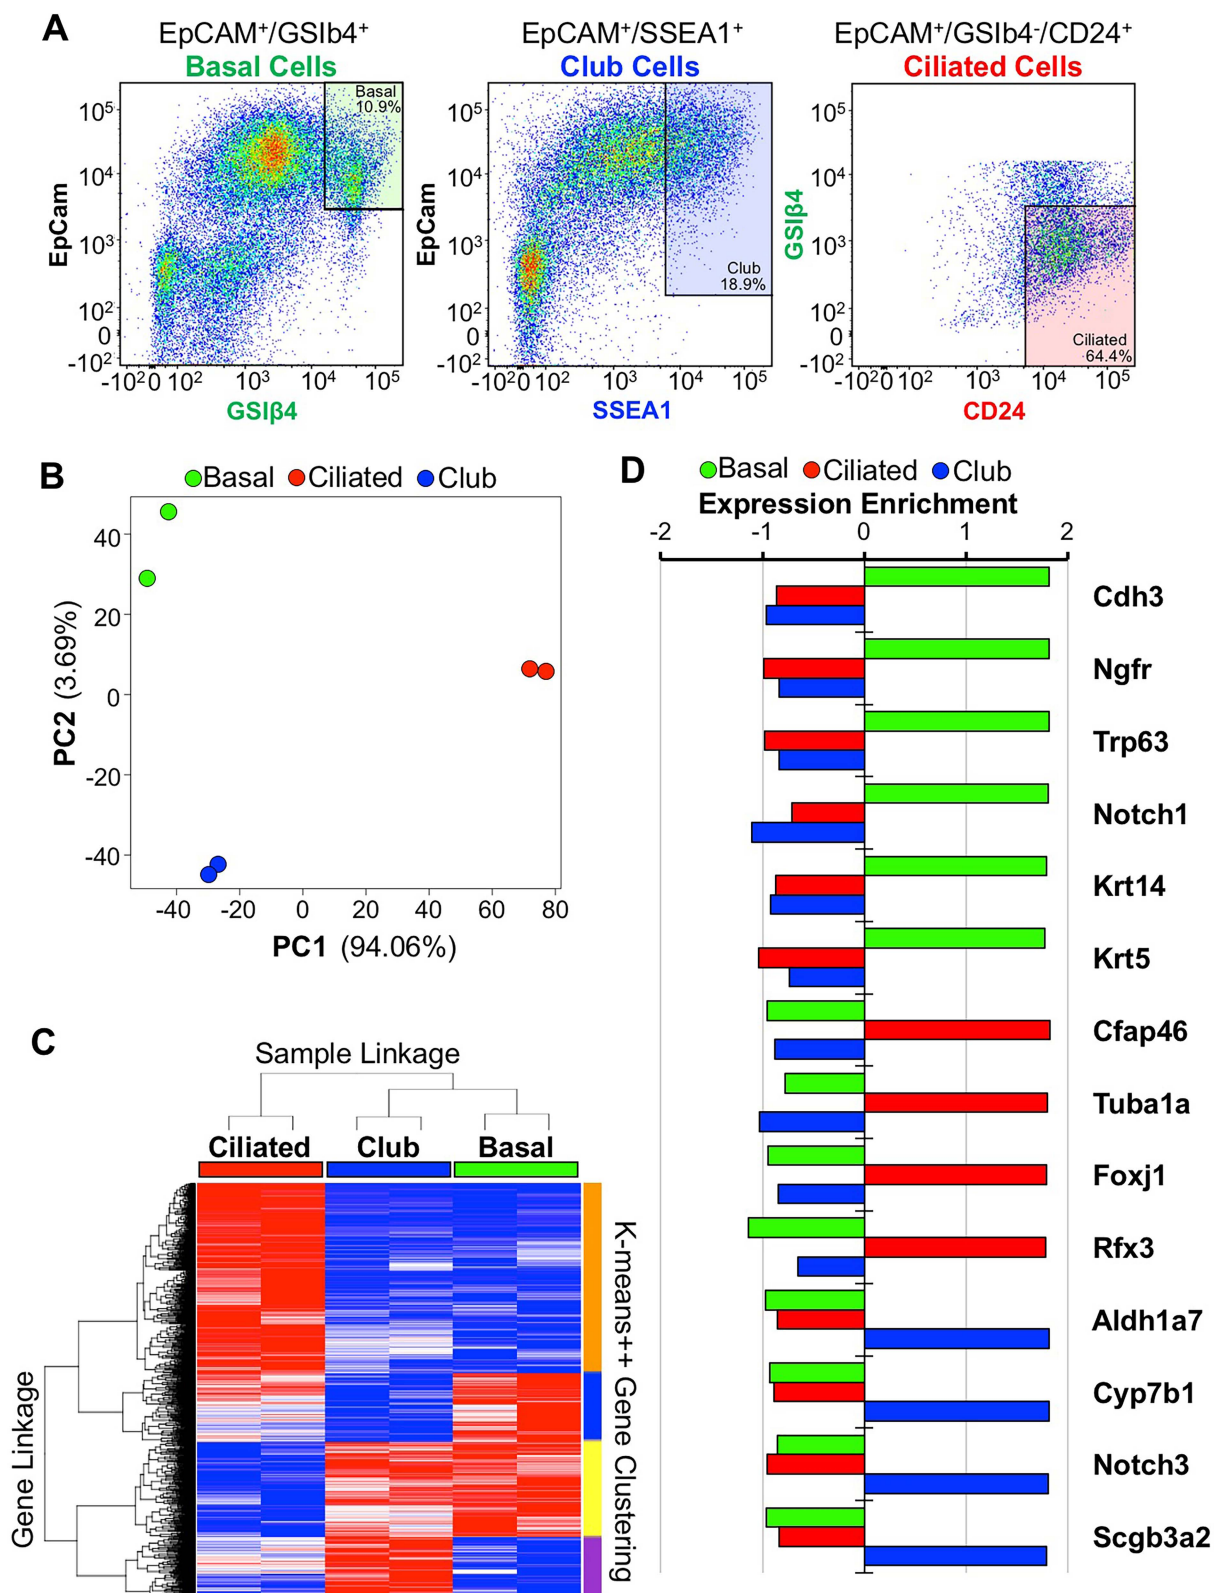

**Figure S6**

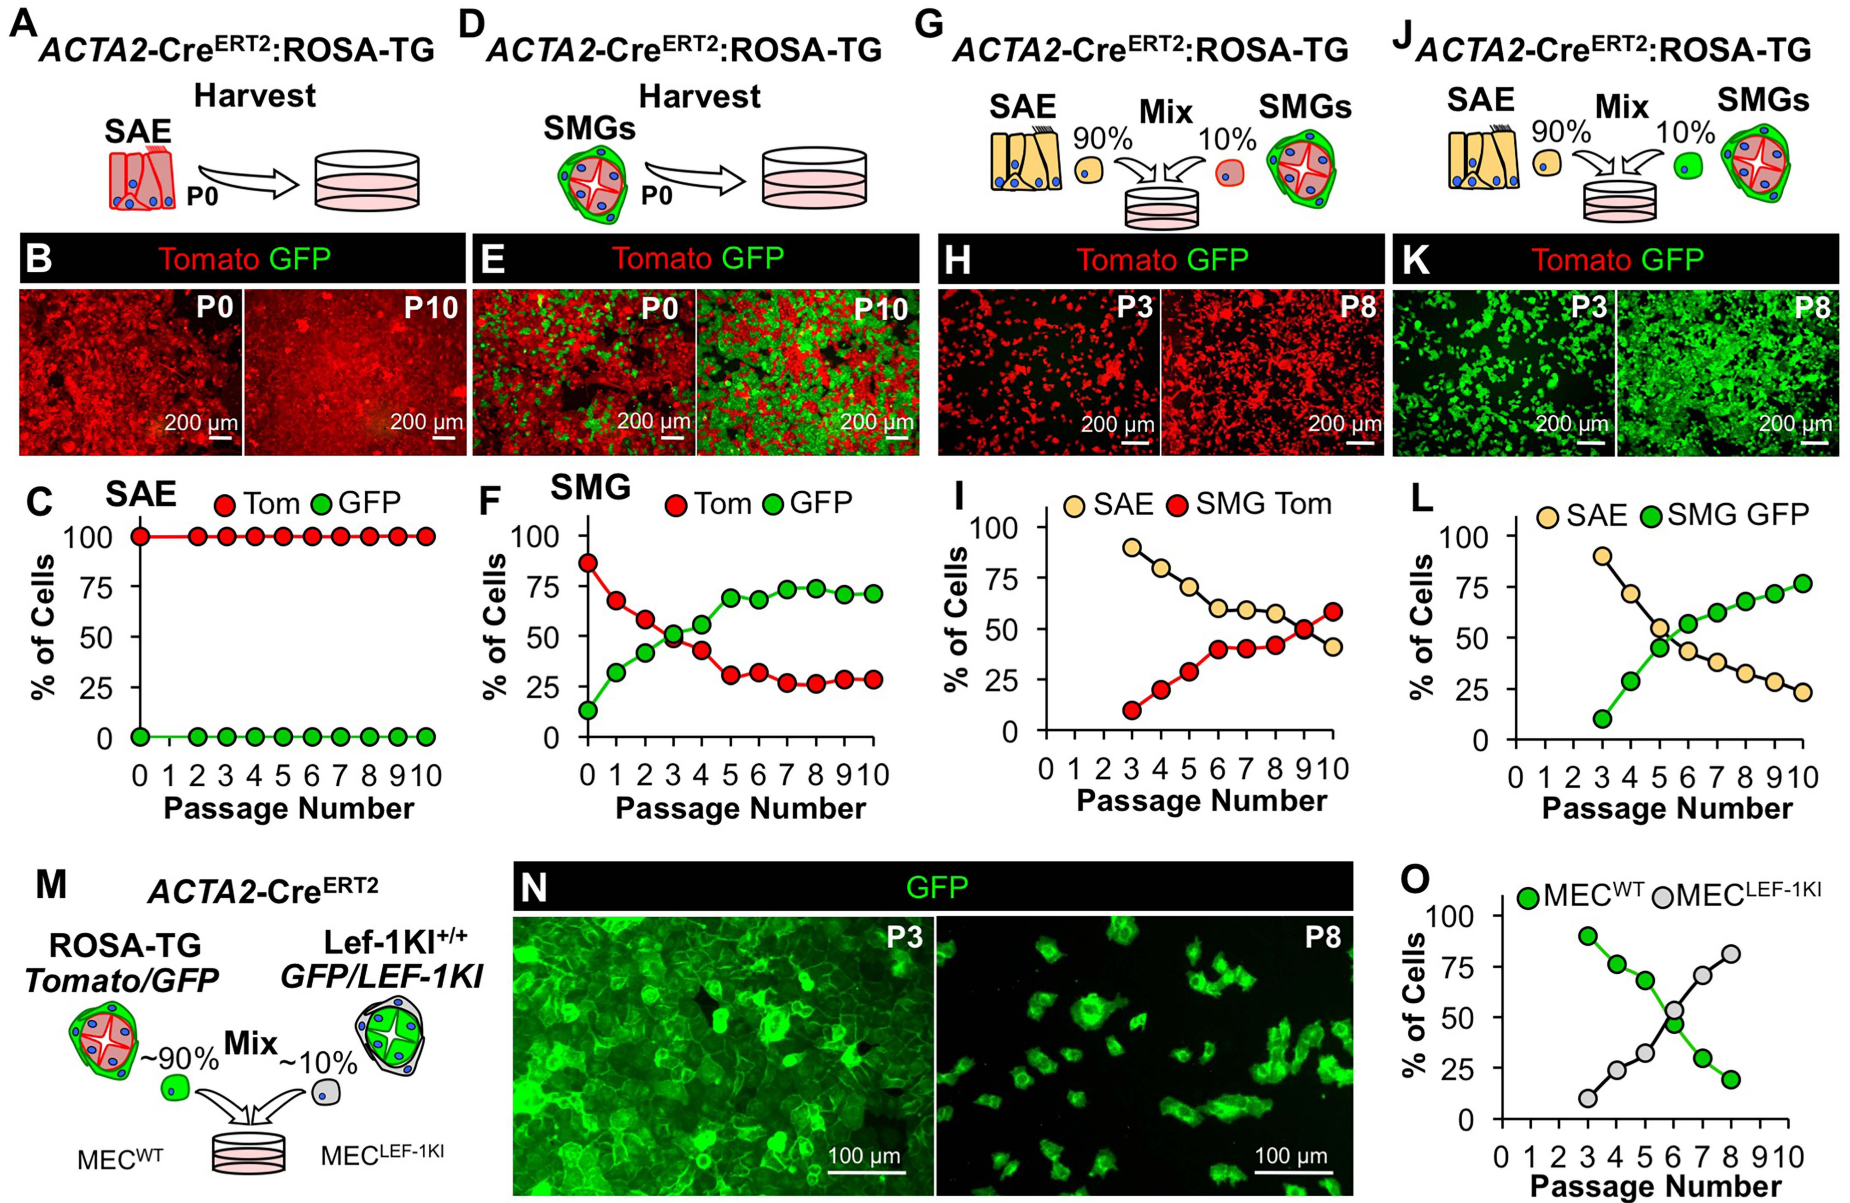



Figure S7

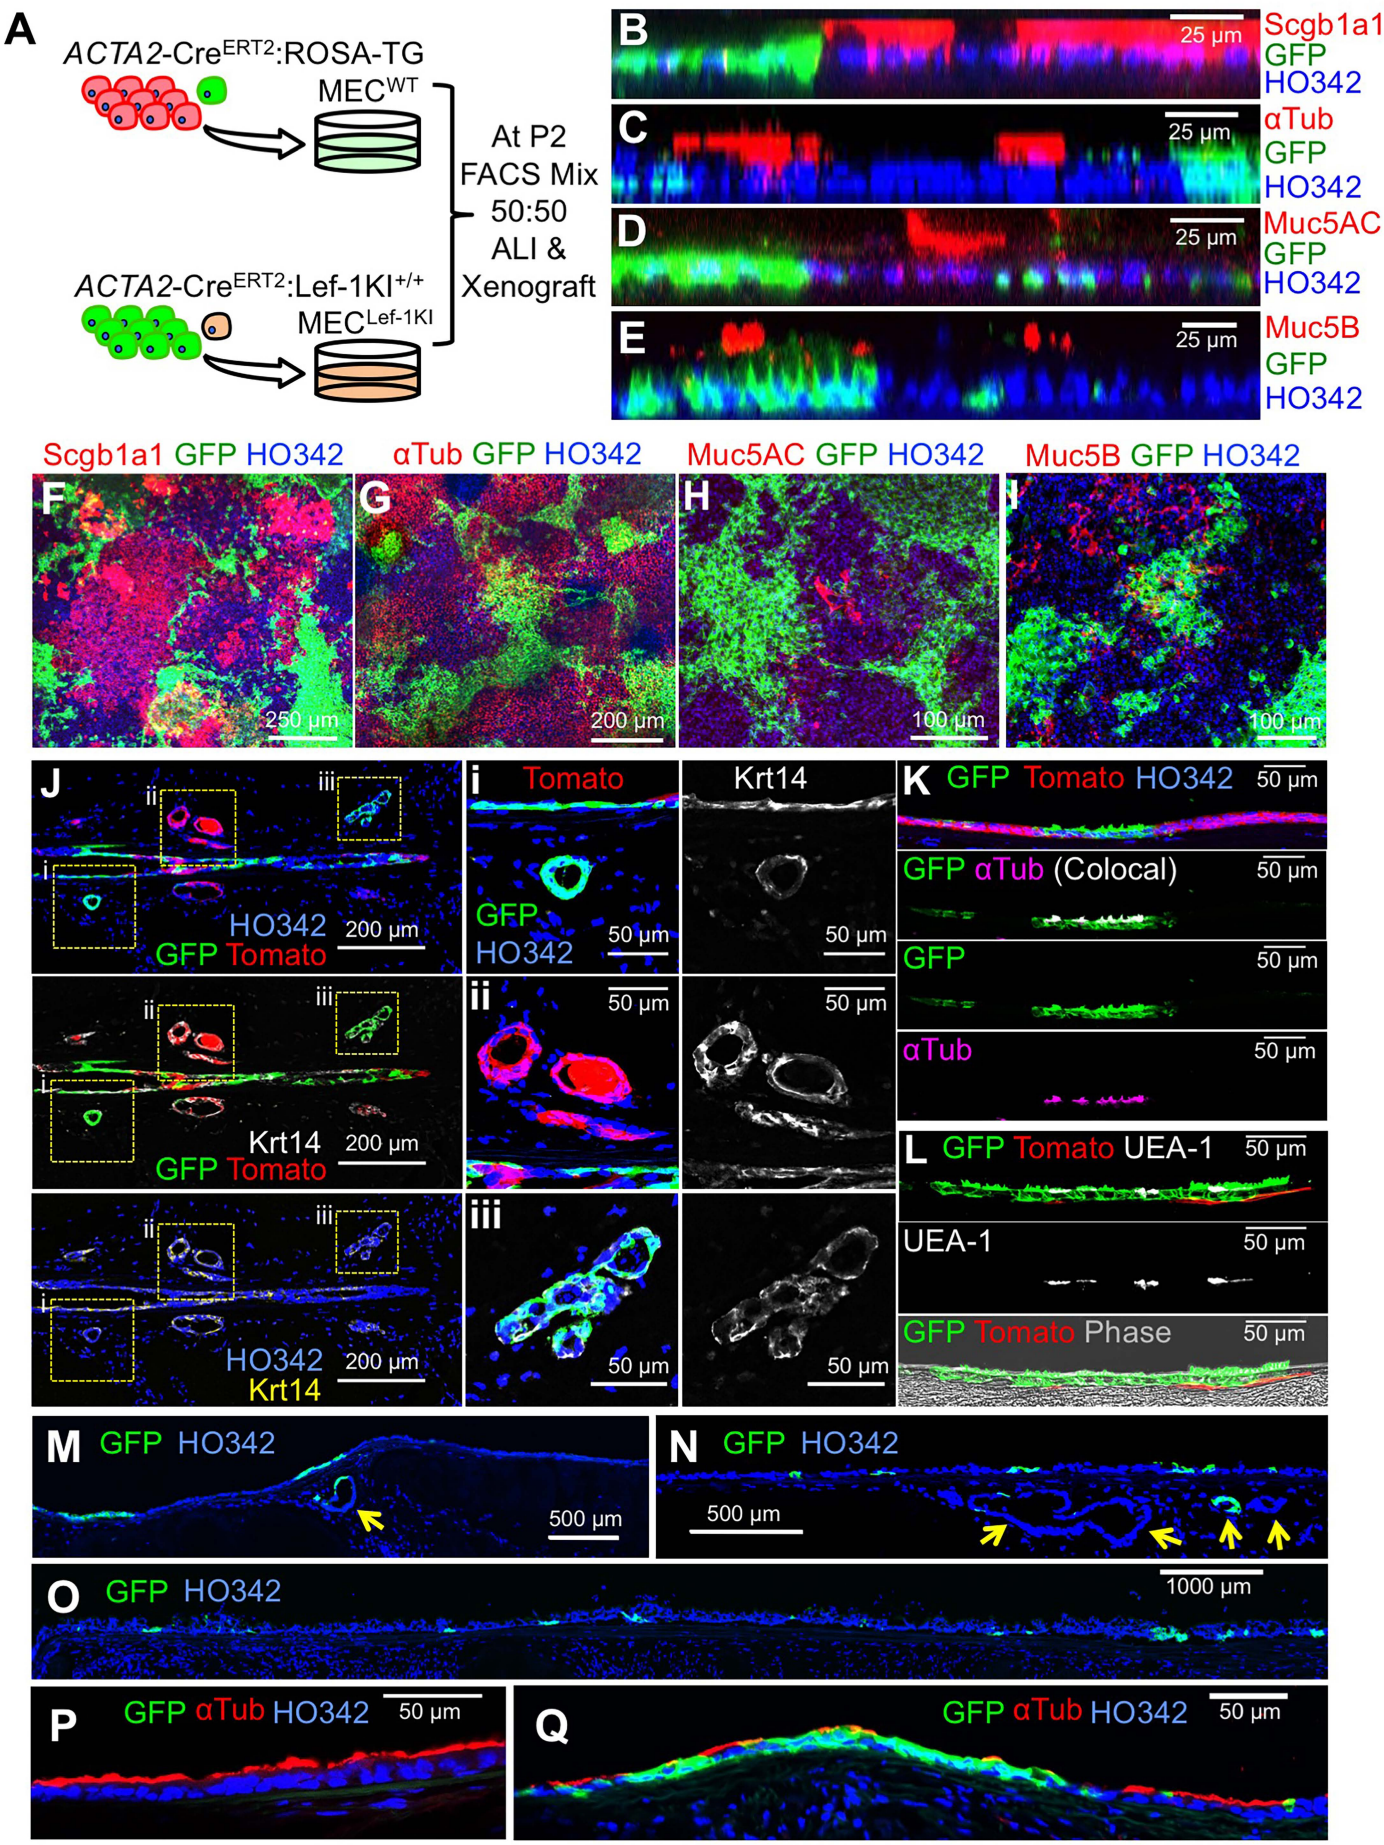

**Table S4:** Related to STAR Methods. **Summary of mouse experiments.**

| <b>Figure</b>          | <b>Mouse Line</b>                                                                                               | <b>Induction Time</b> | <b>Chase Time</b> | <b>Injury Type</b> | <b>Injury Quantity</b> | <b>Time Post-injury to Harvest</b> |
|------------------------|-----------------------------------------------------------------------------------------------------------------|-----------------------|-------------------|--------------------|------------------------|------------------------------------|
| Figure 1               | <i>ACTA2-Cre<sup>ERT2</sup>:ROSA-TG</i>                                                                         | 5 days                | 5 days            | Naphthalene        | Single                 | 21 days                            |
| Figure 2               | <i>ACTA2-Cre<sup>ERT2</sup>:ROSA-TG</i>                                                                         | 5 days                | 5 days            | Naphthalene        | Single                 | 7, 14, 21, 60 days                 |
| Figure 3               | <i>ACTA2-Cre<sup>ERT2</sup>:ROSA-TG</i>                                                                         | 5 days                | 5 days            | Naphthalene        | Single and Double      | 60 days                            |
| Figure 4               | C57BL/6                                                                                                         | N/A                   | N/A               | Naphthalene        | Single                 | 12 and 24 hours                    |
| Figure 5 (Panels A-F)  | <i>ACTA2-Cre<sup>ERT2</sup>:ROSA-TG</i> and <i>ACTA2-Cre<sup>ERT2</sup>:Lef-1KI<sup>+/+</sup></i>               | 5 days                | 0 days            | N/A                | N/A                    | N/A                                |
| Figure 5 (Panels G-U)  | <i>ACTA2-Cre<sup>ERT2</sup>:Lef-1KI<sup>+/-</sup></i> and <i>ACTA2-Cre<sup>ERT2</sup>:Lef-1KI<sup>+/+</sup></i> | 5 days                | 5 days            | Naphthalene        | Single                 | 21 days                            |
| Figure 6               | <i>ACTA2-Cre<sup>ERT2</sup>:Lef-1KI<sup>+/-</sup></i> and <i>ACTA2-Cre<sup>ERT2</sup>:Lef-1KI<sup>+/+</sup></i> | 5 days                | 21 days           | SO <sub>2</sub>    | Single and Double      | 21 and 42 days                     |
| Figure S1 (Panels A-E) | C57BL/6                                                                                                         | N/A                   | N/A               | Naphthalene        | Single                 | 1, 3, 5, 7 days                    |
| Figure S1 (Panels F-J) | <i>ACTA2-Cre<sup>ERT2</sup>:ROSA-TG</i> and <i>MYH11-Cre<sup>ERT2</sup>:ROSA-TG</i>                             | 5 days                | 5 days            | N/A                | N/A                    | N/A                                |
| Figure S2              | <i>MYH11-Cre<sup>ERT2</sup>:ROSA-TG</i>                                                                         | 5 days                | 5 days            | Naphthalene        | Single                 | 21 days                            |
| Figure S3              | <i>ACTA2-Cre<sup>ERT2</sup>:ROSA-TG</i>                                                                         | 5 days                | 21 days           | SO <sub>2</sub>    | Single                 | 7, 14, 21, 60 days                 |
| Figure S4              | <i>MYH11-Cre<sup>ERT2</sup>:Lef-1KI<sup>+/-</sup></i>                                                           | 5 days                | 5 days            | Naphthalene        | Single                 | 21 days                            |
